# Supplementary material for: Development and Validation of the Nursing Care and Religious Diversity Scale (NCRDS)
Source: MDPI journal article supplement (doi:10.3390/healthcare11131821), 2023-06-21
Supplement: s1 [file s1]

## APPENDIX

**Table S1. NCRDS item frequencies**

|                 |           | <b>1</b> | <b>2</b> | <b>3</b> | <b>4</b> | <b>5</b> |
|-----------------|-----------|----------|----------|----------|----------|----------|
| <b>NCRDS 1</b>  | Frequency | 28       | 50       | 132      | 60       | 47       |
|                 | %         | 8,8      | 15,8     | 41,6     | 18,9     | 14,8     |
| <b>NCRDS 2</b>  | Frequency | 38       | 71       | 100      | 57       | 51       |
|                 | %         | 12,0     | 22,4     | 31,5     | 18,0     | 16,1     |
| <b>NCRDS 3</b>  | Frequency | 30       | 82       | 119      | 55       | 31       |
|                 | %         | 9,5      | 25,9     | 37,5     | 17,4     | 9,8      |
| <b>NCRDS 4</b>  | Frequency | 36       | 54       | 115      | 66       | 46       |
|                 | %         | 11,4     | 17,0     | 36,3     | 20,8     | 14,5     |
| <b>NCRDS 5</b>  | Frequency | 59       | 68       | 118      | 47       | 25       |
|                 | %         | 18,6     | 21,5     | 37,2     | 14,8     | 7,9      |
| <b>NCRDS 6</b>  | Frequency | 21       | 72       | 133      | 50       | 41       |
|                 | %         | 6,6      | 22,7     | 42,0     | 15,8     | 12,9     |
| <b>NCRDS 7</b>  | Frequency | 64       | 59       | 40       | 31       | 123      |
|                 | %         | 20,2     | 18,6     | 12,6     | 9,8      | 38,8     |
| <b>NCRDS 8</b>  | Frequency | 34       | 36       | 49       | 45       | 153      |
|                 | %         | 10,7     | 11,4     | 15,5     | 14,2     | 48,3     |
| <b>NCRDS 9</b>  | Frequency | 53       | 74       | 77       | 51       | 62       |
|                 | %         | 16,7     | 23,3     | 24,3     | 16,1     | 19,6     |
| <b>NCRDS 10</b> | Frequency | 80       | 73       | 76       | 43       | 45       |
|                 | %         | 25,2     | 23,0     | 24,0     | 13,6     | 14,2     |
| <b>NCRDS 11</b> | Frequency | 108      | 92       | 58       | 35       | 24       |
|                 | %         | 34,1     | 29,0     | 18,3     | 11,0     | 7,6      |
| <b>NCRDS 12</b> | Frequency | 31       | 39       | 40       | 49       | 158      |
|                 | %         | 9,8      | 12,3     | 12,6     | 15,5     | 49,8     |
| <b>NCRDS 13</b> | Frequency | 88       | 119      | 85       | 19       | 6        |
|                 | %         | 27,8     | 37,5     | 26,8     | 6,0      | 1,9      |
| <b>NCRDS 14</b> | Frequency | 81       | 111      | 101      | 16       | 8        |
|                 | %         | 25,6     | 35,0     | 31,9     | 5,0      | 2,5      |
| <b>NCRDS 15</b> | Frequency | 93       | 102      | 79       | 28       | 15       |
|                 | %         | 29,3     | 32,2     | 24,9     | 8,8      | 4,7      |
| <b>NCRDS 16</b> | Frequency | 183      | 48       | 52       | 25       | 9        |
|                 | %         | 57,7     | 15,1     | 16,4     | 7,9      | 2,8      |
| <b>NCRDS 17</b> | Frequency | 32       | 83       | 144      | 35       | 23       |
|                 | %         | 10,1     | 26,2     | 45,4     | 11,0     | 7,3      |
| <b>NCRDS 18</b> | Frequency | 20       | 65       | 132      | 57       | 43       |
|                 | %         | 6,3      | 20,5     | 41,6     | 18,0     | 13,6     |
| <b>NCRDS 19</b> | Frequency | 31       | 69       | 137      | 49       | 31       |
|                 | %         | 9,8      | 21,8     | 43,2     | 15,5     | 9,8      |
| <b>NCRDS 20</b> | Frequency | 29       | 55       | 122      | 57       | 54       |
|                 | %         | 9,1      | 17,4     | 38,5     | 18,0     | 17,0     |

|                 |           |      |      |      |      |      |
|-----------------|-----------|------|------|------|------|------|
| <b>NCRDS 21</b> | Frequency | 36   | 101  | 108  | 55   | 17   |
|                 | %         | 11,4 | 31,9 | 34,1 | 17,4 | 5,4  |
| <b>NCRDS 22</b> | Frequency | 57   | 55   | 115  | 62   | 28   |
|                 | %         | 18,0 | 17,4 | 36,3 | 19,6 | 8,8  |
| <b>NCRDS 23</b> | Frequency | 38   | 105  | 123  | 31   | 20   |
|                 | %         | 12,0 | 33,1 | 38,8 | 9,8  | 6,3  |
| <b>NCRDS 24</b> | Frequency | 19   | 47   | 130  | 79   | 42   |
|                 | %         | 6,0  | 14,8 | 41,0 | 24,9 | 13,2 |
| <b>NCRDS 25</b> | Frequency | 45   | 83   | 114  | 52   | 23   |
|                 | %         | 14,2 | 26,2 | 36,0 | 16,4 | 7,3  |

**Table S2. KMO and Bartlett test<sup>at</sup>**

|                                                  |                    |          |
|--------------------------------------------------|--------------------|----------|
| Kaiser-Meyer-Olkin measure of sampling adequacy. |                    | .780     |
| Bartlett sphericity test                         | Approx. Chi-square | 4805.085 |
|                                                  | G1                 | 528      |
|                                                  | Sign.              | .000     |

a. Based on correlations

**Table S3. Commonality**

|          | Crude   |            | Modified scale |            |
|----------|---------|------------|----------------|------------|
|          | Initial | Extraction | Initial        | Extraction |
| NCRDS_1  | 1.739   | 1.078      | 1.000          | .620       |
| NCRDS_2  | .971    | .328       | 1.000          | .338       |
| NCRDS_3  | .620    | .098       | 1.000          | .159       |
| NCRDS_4  | 2.571   | 2.305      | 1.000          | .896       |
| NCRDS_5  | 2.014   | 1.654      | 1.000          | .821       |
| NCRDS_6  | 1.975   | 1.360      | 1.000          | .689       |
| NCRDS_7  | 1.851   | 1.288      | 1.000          | .696       |
| NCRDS_8  | 1.849   | 1.394      | 1.000          | .754       |
| NCRDS_9  | 1.567   | 1.059      | 1.000          | .676       |
| NCRDS_10 | 1.608   | 1.057      | 1.000          | .657       |
| NCRDS_11 | 1.232   | .759       | 1.000          | .617       |
| NCRDS_12 | 1.110   | .328       | 1.000          | .295       |
| NCRDS_13 | 1.094   | .226       | 1.000          | .207       |
| NCRDS_14 | 1.044   | .491       | 1.000          | .470       |
| NCRDS_15 | 1.420   | .942       | 1.000          | .663       |
| NCRDS_16 | 1.168   | .530       | 1.000          | .454       |
| NCRDS_17 | 1.026   | .639       | 1.000          | .623       |
| NCRDS_18 | 1.184   | .696       | 1.000          | .588       |
| NCRDS_19 | 1.169   | .789       | 1.000          | .675       |
| NCRDS_20 | 1.378   | .952       | 1.000          | .691       |
| NCRDS_21 | 9.352   | 9.332      | 1.000          | .998       |
| NCRDS_22 | 1.348   | .582       | 1.000          | .431       |
| NCRDS_23 | 1.230   | .762       | 1.000          | .619       |
| NCRDS_24 | 1.172   | .809       | 1.000          | .691       |
| NCRDS_25 | 1.199   | .661       | 1.000          | .551       |
| NCRDS_26 | 1.530   | 1.051      | 1.000          | .687       |
| NCRDS_27 | 1.274   | .945       | 1.000          | .741       |

|          |       |       |       |      |
|----------|-------|-------|-------|------|
| NCRDS_28 | 1.407 | .844  | 1.000 | .599 |
| NCRDS_29 | 1.323 | .726  | 1.000 | .548 |
| NCRDS_30 | .949  | .650  | 1.000 | .685 |
| NCRDS_31 | .931  | .707  | 1.000 | .760 |
| NCRDS_32 | 1.250 | 1.008 | 1.000 | .806 |
| NCRDS_33 | 1.287 | .920  | 1.000 | .715 |

Extraction method: Analysis of the main components.

**Table S4. Total variance explained**

|                | Component | Initial eigenvalues <sup>to</sup> |            |              | Loading sums of extraction squares |            |              | Loading of rotation squares sums |            |              |
|----------------|-----------|-----------------------------------|------------|--------------|------------------------------------|------------|--------------|----------------------------------|------------|--------------|
|                |           | Total                             | % variance | % cumulative | Total                              | % variance | % cumulative | Total                            | % variance | % cumulative |
| Crude          | 1         | 10.022                            | 18.965     | 18.965       | 10.022                             | 18.965     | 18.965       | 5.361                            | 10.145     | 10.145       |
|                | 2         | 8.271                             | 15.652     | 34.617       | 8.271                              | 15.652     | 34.617       | 3.538                            | 6.696      | 16.841       |
|                | 3         | 5.620                             | 10.636     | 45.252       | 5.620                              | 10.636     | 45.252       | 3.757                            | 7.109      | 23.950       |
|                | 4         | 4.365                             | 8.260      | 53.512       | 4.365                              | 8.260      | 53.512       | 3.477                            | 6.580      | 30.530       |
|                | 5         | 2.757                             | 5.218      | 58.730       | 2.757                              | 5.218      | 58.730       | 4.516                            | 8.546      | 39.076       |
|                | 6         | 2.489                             | 4.710      | 63.439       | 2.489                              | 4.710      | 63.439       | 4.427                            | 8.378      | 47.454       |
|                | 7         | 1.814                             | 3.433      | 66.873       | 1.814                              | 3.433      | 66.873       | 2.732                            | 5.170      | 52.624       |
|                | 8         | 1.633                             | 3.090      | 69.963       | 1.633                              | 3.090      | 69.963       | 9.163                            | 17.339     | 69.963       |
|                | 9         | 1.505                             | 2.849      | 72.812       |                                    |            |              |                                  |            |              |
|                | 10        | 1.293                             | 2.447      | 75.259       |                                    |            |              |                                  |            |              |
|                | 11        | 1.241                             | 2.348      | 77.607       |                                    |            |              |                                  |            |              |
|                | 12        | 1.136                             | 2.150      | 79.758       |                                    |            |              |                                  |            |              |
|                | 13        | 1.055                             | 1.996      | 81.753       |                                    |            |              |                                  |            |              |
|                | 14        | .950                              | 1.798      | 83.551       |                                    |            |              |                                  |            |              |
|                | 15        | .846                              | 1.600      | 85.151       |                                    |            |              |                                  |            |              |
|                | 16        | .750                              | 1.420      | 86.571       |                                    |            |              |                                  |            |              |
|                | 17        | .698                              | 1.321      | 87.892       |                                    |            |              |                                  |            |              |
|                | 18        | .657                              | 1.243      | 89.135       |                                    |            |              |                                  |            |              |
|                | 19        | .585                              | 1.108      | 90.242       |                                    |            |              |                                  |            |              |
|                | 20        | .559                              | 1.058      | 91.301       |                                    |            |              |                                  |            |              |
|                | 21        | .523                              | .989       | 92.290       |                                    |            |              |                                  |            |              |
|                | 22        | .495                              | .936       | 93.226       |                                    |            |              |                                  |            |              |
|                | 23        | .485                              | .918       | 94.144       |                                    |            |              |                                  |            |              |
|                | 24        | .459                              | .869       | 95.013       |                                    |            |              |                                  |            |              |
|                | 25        | .413                              | .781       | 95.795       |                                    |            |              |                                  |            |              |
|                | 26        | .374                              | .707       | 96.502       |                                    |            |              |                                  |            |              |
|                | 27        | .346                              | .656       | 97.157       |                                    |            |              |                                  |            |              |
|                | 28        | .311                              | .589       | 97.746       |                                    |            |              |                                  |            |              |
|                | 29        | .296                              | .559       | 98.306       |                                    |            |              |                                  |            |              |
|                | 30        | .277                              | .524       | 98.830       |                                    |            |              |                                  |            |              |
|                | 31        | .234                              | .442       | 99.272       |                                    |            |              |                                  |            |              |
|                | 32        | .214                              | .404       | 99.676       |                                    |            |              |                                  |            |              |
|                | 33        | .171                              | .324       | 100.000      |                                    |            |              |                                  |            |              |
| Modified scale | 1         | 10.022                            | 18.965     | 18.965       | 1.953                              | 5.919      | 5.919        | 4.101                            | 12.426     | 12.426       |
|                | 2         | 8.271                             | 15.652     | 34.617       | 5.369                              | 16.270     | 22.189       | 3.048                            | 9.235      | 21.661       |
|                | 3         | 5.620                             | 10.636     | 45.252       | 3.613                              | 10.948     | 33.137       | 2.998                            | 9.086      | 30.747       |
|                | 4         | 4.365                             | 8.260      | 53.512       | 3.343                              | 10.129     | 43.266       | 2.651                            | 8.033      | 38.781       |
|                | 5         | 2.757                             | 5.218      | 58.730       | 1.960                              | 5.940      | 49.207       | 2.622                            | 7.947      | 46.727       |
|                | 6         | 2.489                             | 4.710      | 63.439       | 1.519                              | 4.604      | 53.811       | 2.053                            | 6.222      | 52.949       |
|                | 7         | 1.814                             | 3.433      | 66.873       | 1.396                              | 4.232      | 58.043       | 1.814                            | 5.496      | 58.445       |
|                | 8         | 1.633                             | 3.090      | 69.963       | 1.267                              | 3.840      | 61.882       | 1.134                            | 3.438      | 61.882       |
|                | 9         | 1.505                             | 2.849      | 72.812       |                                    |            |              |                                  |            |              |
|                | 10        | 1.293                             | 2.447      | 75.259       |                                    |            |              |                                  |            |              |

|    |       |       |         |  |  |  |  |  |  |
|----|-------|-------|---------|--|--|--|--|--|--|
| 11 | 1.241 | 2.348 | 77.607  |  |  |  |  |  |  |
| 12 | 1.136 | 2.150 | 79.758  |  |  |  |  |  |  |
| 13 | 1.055 | 1.996 | 81.753  |  |  |  |  |  |  |
| 14 | .950  | 1.798 | 83.551  |  |  |  |  |  |  |
| 15 | .846  | 1.600 | 85.151  |  |  |  |  |  |  |
| 16 | .750  | 1.420 | 86.571  |  |  |  |  |  |  |
| 17 | .698  | 1.321 | 87.892  |  |  |  |  |  |  |
| 18 | .657  | 1.243 | 89.135  |  |  |  |  |  |  |
| 19 | .585  | 1.108 | 90.242  |  |  |  |  |  |  |
| 20 | .559  | 1.058 | 91.301  |  |  |  |  |  |  |
| 21 | .523  | .989  | 92.290  |  |  |  |  |  |  |
| 22 | .495  | .936  | 93.226  |  |  |  |  |  |  |
| 23 | .485  | .918  | 94.144  |  |  |  |  |  |  |
| 24 | .459  | .869  | 95.013  |  |  |  |  |  |  |
| 25 | .413  | .781  | 95.795  |  |  |  |  |  |  |
| 26 | .374  | .707  | 96.502  |  |  |  |  |  |  |
| 27 | .346  | .656  | 97.157  |  |  |  |  |  |  |
| 28 | .311  | .589  | 97.746  |  |  |  |  |  |  |
| 29 | .296  | .559  | 98.306  |  |  |  |  |  |  |
| 30 | .277  | .524  | 98.830  |  |  |  |  |  |  |
| 31 | .234  | .442  | 99.272  |  |  |  |  |  |  |
| 32 | .214  | .404  | 99.676  |  |  |  |  |  |  |
| 33 | .171  | .324  | 100.000 |  |  |  |  |  |  |

Extraction method: Analysis of the main components.

a. When analyzing a covariance matrix, the initial eigenvalues are the same in the raw and modified scale solution.

**Table S5. Component array<sup>a</sup>**

| Crude<br>Component |        |      |       |       |       |       |       |       | Modified scale<br>Component |      |       |       |       |       |       |       |
|--------------------|--------|------|-------|-------|-------|-------|-------|-------|-----------------------------|------|-------|-------|-------|-------|-------|-------|
| 1                  | 2      | 3    | 4     | 5     | 6     | 7     | 8     |       | 1                           | 2    | 3     | 4     | 5     | 6     | 7     | 8     |
| NCRDS_21           | -2.943 | .718 | .107  | .123  | -.310 | -.179 | -.011 | -.048 | -.962                       | .235 | .035  | .040  | -.101 | -.058 | -.004 | -.016 |
| NCRDS_13           | .289   | .170 | -.089 | .174  | -.004 | .023  | .192  | -.196 | .276                        | .163 | -.085 | .166  | -.004 | .022  | .184  | -.187 |
| NCRDS_4            | .221   | .931 | -.741 | -.432 | .452  | -.606 | .242  | .154  | .138                        | .581 | -.462 | -.269 | .282  | -.378 | .151  | .096  |
| NCRDS_25           | .302   | .620 | .253  | .144  | -.117 | -.114 | -.097 | -.255 | .276                        | .566 | .231  | .131  | -.107 | -.104 | -.089 | -.233 |
| NCRDS_19           | -.103  | .594 | .364  | -.029 | .127  | .255  | .456  | -.055 | -.095                       | .550 | .337  | -.027 | .118  | .236  | .421  | -.050 |
| NCRDS_23           | .205   | .597 | .482  | .170  | -.084 | -.172 | -.205 | -.156 | .185                        | .538 | .434  | .153  | -.076 | -.155 | -.184 | -.141 |
| NCRDS_24           | .220   | .559 | .433  | .151  | .045  | -.233 | -.410 | -.115 | .203                        | .517 | .400  | .140  | .041  | -.215 | -.379 | -.106 |
| NCRDS_28           | .413   | .608 | .426  | -.263 | -.182 | -.004 | -.091 | -.106 | .349                        | .512 | .359  | -.221 | -.153 | -.003 | -.077 | -.089 |
| NCRDS_9            | .106   | .616 | -.596 | -.103 | -.136 | .494  | -.020 | -.200 | .085                        | .492 | -.476 | -.083 | -.109 | .395  | -.016 | -.160 |
| NCRDS_20           | .172   | .557 | .433  | -.425 | -.107 | .197  | .431  | -.095 | .146                        | .475 | .369  | -.362 | -.091 | .168  | .367  | -.081 |
| NCRDS_18           | .037   | .487 | .449  | -.176 | .080  | .358  | .299  | .025  | .034                        | .448 | .413  | -.162 | .073  | .329  | .275  | .023  |
| NCRDS_16           | .179   | .449 | .373  | -.281 | .112  | .127  | .085  | .205  | .166                        | .416 | .345  | -.260 | .104  | .117  | .079  | .189  |
| NCRDS_12           | .223   | .411 | -.030 | .086  | -.087 | -.184 | .057  | -.236 | .212                        | .390 | -.029 | .081  | -.083 | -.174 | .054  | -.224 |
| NCRDS_26           | .125   | .603 | .714  | -.184 | .144  | .085  | -.290 | .130  | .101                        | .487 | .577  | -.148 | .116  | .069  | -.234 | .105  |
| NCRDS_27           | .207   | .575 | .648  | -.059 | .077  | .013  | -.372 | -.057 | .183                        | .510 | .574  | -.052 | .068  | .012  | -.329 | -.051 |
| NCRDS_8            | .145   | .680 | -.763 | .138  | -.142 | .440  | -.304 | -.050 | .107                        | .500 | -.561 | .101  | -.104 | .324  | -.223 | -.037 |
| NCRDS_7            | .171   | .618 | -.721 | -.073 | -.357 | .336  | -.333 | -.031 | .126                        | .454 | -.530 | -.054 | -.262 | .247  | -.245 | -.023 |
| NCRDS_5            | -.022  | .712 | -.743 | -.082 | .567  | -.494 | .034  | .146  | -.016                       | .502 | -.523 | -.058 | .399  | -.348 | .024  | .103  |
| NCRDS_22           | -.033  | .234 | .481  | .364  | .299  | -.080 | -.251 | .057  | -.029                       | .202 | .414  | .313  | .258  | -.069 | -.216 | .049  |
| NCRDS_32           | .132   | .188 | -.068 | .844  | -.190 | -.072 | .037  | .441  | .118                        | .168 | -.061 | .755  | -.170 | -.065 | .033  | .395  |
| NCRDS_31           | .235   | .248 | -.051 | .601  | -.316 | -.063 | .098  | .336  | .244                        | .257 | -.053 | .623  | -.327 | -.066 | .102  | .349  |
| NCRDS_6            | .062   | .657 | -.304 | -.838 | -.152 | -.109 | -.248 | .181  | .044                        | .468 | -.216 | -.596 | -.108 | -.078 | -.176 | .129  |
| NCRDS_30           | .256   | .206 | -.083 | .568  | -.329 | -.131 | .053  | .289  | .263                        | .211 | -.085 | .584  | -.338 | -.134 | .054  | .297  |
| NCRDS_15           | .209   | .545 | -.110 | .675  | .048  | -.131 | .151  | -.301 | .176                        | .457 | -.092 | .567  | .040  | -.110 | .127  | -.253 |
| NCRDS_11           | .022   | .349 | .034  | .625  | .477  | -.012 | .083  | -.098 | .020                        | .315 | .031  | .563  | .430  | -.011 | .075  | -.088 |
| NCRDS_14           | .067   | .306 | .093  | .410  | .405  | .124  | .090  | -.169 | .066                        | .299 | .091  | .401  | .396  | .121  | .089  | -.166 |

|          |       |       |       |       |       |       |       |       |       |       |       |       |       |       |       |       |
|----------|-------|-------|-------|-------|-------|-------|-------|-------|-------|-------|-------|-------|-------|-------|-------|-------|
| NCRDS_33 | .354  | .479  | -.169 | .128  | -.629 | -.060 | .253  | .239  | .312  | .422  | -.149 | .113  | -.554 | -.053 | .223  | .211  |
| NCRDS_1  | -.467 | .012  | .041  | -.235 | .583  | .477  | -.004 | .485  | -.354 | .009  | .031  | -.179 | .442  | .361  | -.003 | .368  |
| NCRDS_2  | -.144 | -.018 | -.058 | .309  | .435  | .012  | .026  | -.133 | -.146 | -.019 | -.059 | .314  | .442  | .013  | .027  | -.135 |
| NCRDS_3  | -.002 | .014  | -.098 | .176  | .211  | .055  | -.079 | .062  | -.003 | .018  | -.124 | .223  | .268  | .070  | -.101 | .079  |
| NCRDS_10 | -.233 | .127  | -.412 | .399  | .327  | .705  | -.229 | .000  | -.184 | .100  | -.325 | .315  | .258  | .556  | -.181 | .000  |
| NCRDS_17 | .014  | .511  | .104  | .026  | -.080 | .308  | .514  | -.023 | .014  | .505  | .103  | .026  | -.079 | .304  | .507  | -.022 |
| NCRDS_29 | .152  | .303  | .451  | .089  | .004  | .060  | -.084 | .623  | .132  | .263  | .392  | .077  | .004  | .053  | -.073 | .542  |

Extraction method: Analysis of the main components.

a. 8 extracted components.

**Table S6. Matrix of rotated components<sup>10</sup>**

|          | Crude Component |       |       |       |       |       |       |       | Modified scale Component |       |       |       |       |       |       |       |
|----------|-----------------|-------|-------|-------|-------|-------|-------|-------|--------------------------|-------|-------|-------|-------|-------|-------|-------|
|          | 1               | 2     | 3     | 4     | 5     | 6     | 7     | 8     | 1                        | 2     | 3     | 4     | 5     | 6     | 7     | 8     |
| NCRDS_27 | .943            | -.043 | .222  | .031  | .009  | -.040 | -.011 | -.034 | .835                     | -.038 | .197  | .028  | .008  | -.035 | -.009 | -.030 |
| NCRDS_24 | .859            | .110  | -.018 | .120  | .009  | .093  | .189  | .022  | .793                     | .101  | -.016 | .111  | .008  | .086  | .175  | .020  |
| NCRDS_26 | .925            | -.058 | .368  | -.014 | -.042 | .015  | -.232 | -.012 | .748                     | -.047 | .298  | -.011 | -.034 | .012  | -.187 | -.010 |
| NCRDS_23 | .781            | .175  | .178  | .063  | -.010 | .019  | .286  | .062  | .704                     | .158  | .161  | .057  | -.009 | .017  | .258  | .056  |
| NCRDS_28 | .713            | .006  | .392  | -.277 | .120  | .086  | .213  | -.194 | .601                     | .005  | .330  | -.233 | .101  | .073  | .179  | -.163 |
| NCRDS_25 | .612            | .162  | .219  | .057  | .152  | .089  | .421  | -.032 | .559                     | .148  | .200  | .052  | .139  | .081  | .384  | -.029 |
| NCRDS_22 | .558            | .128  | -.014 | .423  | -.216 | -.086 | -.110 | .097  | .480                     | .110  | -.012 | .364  | -.186 | -.074 | -.095 | .083  |
| NCRDS_29 | .479            | .442  | .234  | -.052 | -.141 | .019  | -.461 | -.102 | .417                     | .384  | .204  | -.045 | -.123 | .017  | -.401 | -.089 |
| NCRDS_31 | .071            | .820  | .026  | .090  | .081  | -.023 | .115  | -.040 | .074                     | .849  | .027  | .093  | .084  | -.024 | .119  | -.042 |
| NCRDS_32 | .040            | .945  | -.095 | .316  | .031  | -.054 | .003  | .033  | .036                     | .845  | -.085 | .282  | .027  | -.049 | .003  | .030  |
| NCRDS_30 | .069            | .778  | -.056 | .052  | .070  | -.001 | .164  | -.054 | .071                     | .798  | -.057 | .053  | .071  | -.001 | .169  | -.056 |
| NCRDS_33 | .060            | .686  | .289  | -.396 | .291  | .166  | .293  | -.080 | .053                     | .605  | .255  | -.349 | .257  | .146  | .259  | -.071 |
| NCRDS_19 | .240            | .007  | .817  | .186  | .007  | .059  | .030  | .156  | .222                     | .006  | .756  | .172  | .006  | .055  | .028  | .145  |
| NCRDS_17 | .014            | .168  | .746  | .067  | .174  | .036  | .120  | .059  | .014                     | .166  | .737  | .066  | .171  | .036  | .118  | .059  |
| NCRDS_20 | .336            | -.129 | .851  | -.267 | .006  | .081  | .123  | -.078 | .286                     | -.110 | .725  | -.228 | .005  | .069  | .105  | -.066 |
| NCRDS_18 | .331            | -.058 | .753  | .029  | .035  | -.052 | -.107 | -.017 | .304                     | -.054 | .692  | .026  | .032  | -.048 | -.098 | -.016 |
| NCRDS_16 | .438            | -.017 | .490  | -.101 | -.011 | .159  | -.202 | -.145 | .406                     | -.016 | .453  | -.094 | -.010 | .147  | -.187 | -.134 |
| NCRDS_11 | .180            | .237  | .114  | .790  | -.007 | .119  | .136  | .032  | .162                     | .213  | .103  | .712  | -.006 | .107  | .123  | .029  |
| NCRDS_14 | .182            | .069  | .210  | .624  | .046  | .023  | .121  | -.043 | .179                     | .067  | .206  | .611  | .045  | .022  | .118  | -.042 |
| NCRDS_2  | -.073           | -.078 | -.056 | .551  | -.063 | .037  | .001  | .069  | -.074                    | -.079 | -.056 | .559  | -.064 | .038  | .001  | .070  |
| NCRDS_3  | -.011           | .051  | -.087 | .265  | .065  | .044  | -.102 | -.038 | -.014                    | .065  | -.111 | .336  | .083  | .056  | -.129 | -.048 |
| NCRDS_8  | .036            | .224  | .006  | .142  | 1.117 | .259  | .093  | -.012 | .027                     | .164  | .005  | .104  | .821  | .190  | .068  | -.009 |
| NCRDS_7  | .057            | .186  | -.034 | -.177 | 1.065 | .259  | .124  | -.006 | .042                     | .137  | -.025 | -.130 | .783  | .191  | .091  | -.004 |
| NCRDS_9  | -.058           | -.012 | .295  | .026  | .949  | .201  | .164  | -.022 | -.047                    | -.009 | .236  | .021  | .758  | .160  | .131  | -.018 |
| NCRDS_10 | -.186           | .006  | -.021 | .643  | .675  | -.202 | -.323 | .087  | -.147                    | .004  | -.016 | .507  | .532  | -.160 | -.254 | .068  |
| NCRDS_4  | .063            | .001  | .214  | .043  | .318  | 1.453 | .187  | -.083 | .040                     | .001  | .133  | .027  | .198  | .906  | .117  | -.052 |
| NCRDS_5  | -.005           | .042  | -.052 | .362  | .314  | 1.187 | .051  | .092  | -.004                    | .029  | -.037 | .255  | .221  | .836  | .036  | .065  |
| NCRDS_6  | .331            | -.242 | .146  | -.624 | .515  | .702  | -.149 | .040  | .235                     | -.172 | .104  | -.444 | .366  | .500  | -.106 | .028  |
| NCRDS_1  | -.112           | -.270 | .264  | .297  | .058  | .088  | -.895 | .148  | -.085                    | -.205 | .200  | .225  | .044  | .067  | -.679 | .112  |
| NCRDS_15 | .203            | .438  | .141  | .541  | .188  | .139  | .583  | .041  | .170                     | .367  | .118  | .454  | .157  | .117  | .489  | .034  |
| NCRDS_12 | .242            | .115  | .127  | .030  | .125  | .208  | .424  | -.029 | .229                     | .109  | .120  | .029  | .119  | .197  | .402  | -.028 |
| NCRDS_13 | -.008           | .124  | .159  | .146  | .106  | .042  | .332  | -.203 | -.008                    | .118  | .152  | .140  | .101  | .040  | .317  | -.194 |
| NCRDS_21 | -.136           | -.237 | .272  | .168  | .052  | .073  | -.464 | 2.989 | -.044                    | -.078 | .089  | .055  | .017  | .024  | -.152 | .977  |

Extraction method: Analysis of the main components.

Rotation method: Varimax with Kaiser normalization.

a. Convergence for rotation performed in 7 iterations.

Table S7. Component Transformation Matrix

| Component | 1     | 2     | 3     | 4     | 5     | 6     | 7     | 8     |
|-----------|-------|-------|-------|-------|-------|-------|-------|-------|
| 1         | .204  | .193  | -.005 | -.091 | .054  | .048  | .263  | -.916 |
| 2         | .532  | .193  | .461  | .099  | .424  | .449  | .141  | .236  |
| 3         | .599  | -.059 | .313  | -.044 | -.577 | -.440 | -.099 | .038  |
| 4         | -.015 | .642  | -.188 | .633  | -.031 | -.302 | .213  | .114  |
| 5         | .041  | -.407 | .014  | .722  | -.198 | .356  | -.306 | -.229 |
| 6         | -.130 | -.125 | .398  | .153  | .560  | -.561 | -.358 | -.172 |
| 7         | -.545 | .145  | .704  | .025  | -.340 | .128  | .228  | -.044 |
| 8         | -.032 | .554  | .009  | -.184 | -.123 | .231  | -.763 | -.086 |

Extraction method: Analysis of the main components.  
Rotation method: Varimax with Kaiser normalization.

Table S8. Normality test (n=317)

|          | Kolmogorov-Smirnov <sup>a</sup> | Sign. |
|----------|---------------------------------|-------|
| NCRDS_1  | 0.152                           |       |
| NCRDS_2  | 0.482                           |       |
| NCRDS_3  | 0.455                           |       |
| NCRDS_4  | 0.246                           |       |
| NCRDS_5  | 0.288                           |       |
| NCRDS_6  | 0.295                           |       |
| NCRDS_7  | 0.166                           |       |
| NCRDS_8  | 0.175                           |       |
| NCRDS_9  | 0.223                           |       |
| NCRDS_10 | 0.196                           |       |
| NCRDS_11 | 0.181                           |       |
| NCRDS_12 | 0.211                           |       |
| NCRDS_13 | 0.191                           |       |
| NCRDS_14 | 0.206                           |       |
| NCRDS_15 | 0.200                           |       |
| NCRDS_16 | 0.234                           |       |
| NCRDS_17 | 0.236                           | 0.000 |
| NCRDS_18 | 0.225                           |       |
| NCRDS_19 | 0.229                           |       |
| NCRDS_20 | 0.205                           |       |
| NCRDS_21 | 0.218                           |       |
| NCRDS_22 | 0.195                           |       |
| NCRDS_23 | 0.227                           |       |
| NCRDS_24 | 0.222                           |       |
| NCRDS_25 | 0.200                           |       |
| NCRDS_26 | 0.172                           |       |
| NCRDS_27 | 0.216                           |       |
| NCRDS_28 | 0.182                           |       |
| NCRDS_29 | 0.194                           |       |
| NCRDS_30 | 0.203                           |       |
| NCRDS_31 | 0.222                           |       |
| NCRDS_32 | 0.212                           |       |
| NCRDS_33 | 0.345                           |       |

a. Correction of significance of Lilliefors
